# Supplementary material
Source: PubMed Central journal article supplement (PMC10846683)
Supplement: NIHMS1855128-supplement-Supporting_Information.pdf [file NIHMS1855128-supplement-Supporting_Information.pdf]

Supporting Information for  
**Experimentally derived and computationally optimized backbone conformational Statistics  
for blocked amino acids**

Jeong-Mo Choi and Rohit V. Pappu\*  
Department of Biomedical Engineering and Center for Biological Systems Engineering  
Washington University in St. Louis  
One Brookings Drive, Campus Box 1097  
St. Louis, Missouri 63130

\*Email: [pappu@wustl.edu](mailto:pappu@wustl.edu)

**Table S1.** (separate Excel file) Basin statistics for coil-library landscapes of 20 amino acids. Bolded numbers indicate the basins with weights > 15%. (Column A) amino acid type; (column B) basin ID; (column C) basin weight; (columns D-E) position of basin centers on the  $(\phi, \psi)$  space; (column F) basin depth in terms of PMF; (column G) basin area in units of  $(2.5^\circ)^2$ ; (column H) manual assignment of the three major basins.

**Table S2.** (separate Excel file) Experimental and calculated  $J$  coupling constants for various combinations of candidates for the three major basins. (Column A) amino acid type; (column B) candidate number for each amino acid; (columns C-H) positions of basin centers on the  $(\phi, \psi)$  space; (column I) experimental  $J$  coupling constants; (column J) calculated  $J$  coupling constants; (column K) absolute errors between the experimental and calculated  $J$  coupling constants; (column L) combinations that provide the smallest absolute errors.

**AminoAcidData.zip.** A zipped archive comprising of individual comma-separated text files with Optimized populations for all 20 amino acids on the  $2.5^\circ \times 2.5^\circ$  grid. Columns and rows correspond to  $\phi$  and  $\psi$  bins, respectively. The total size of each data set is normalized to  $5 \times 10^5$ . There may be some fractional deviations due to round-off.

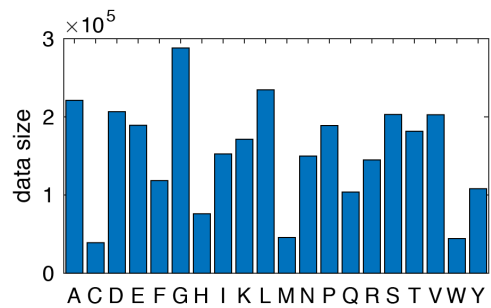

**Figure S1.** Sizes of the data sets used in this work, according to their residue types.

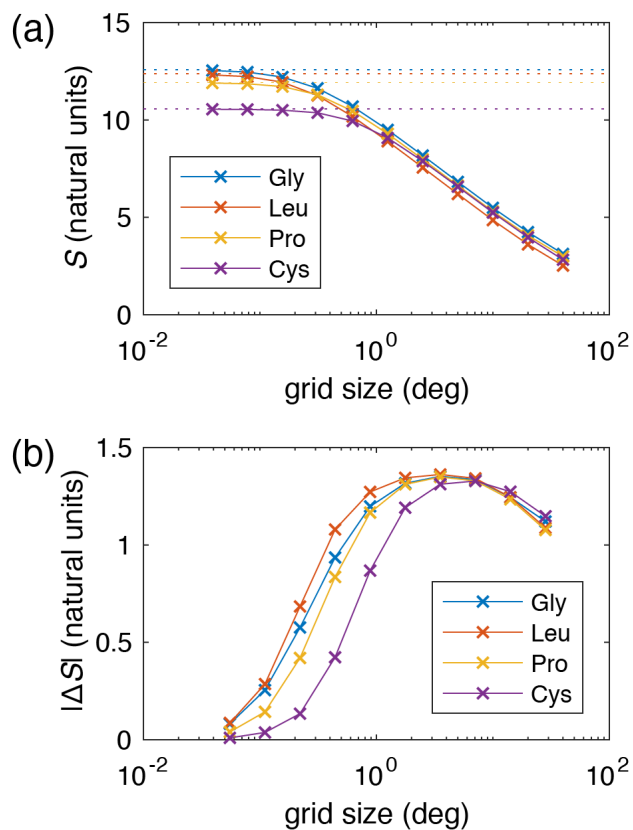

**Figure S2.** Analysis of the information content as a function of grid size. (a) Shannon entropy  $S$  as a function of grid size for four prototypical amino acids, namely, Gly, Leu, Pro, and Cys. The units of  $S$  are natural units of information. The dotted lines show the saturation values of  $S$  for each of the datasets, indicated by their own colors. (b) Absolute difference in Shannon entropy as a function of grid size.

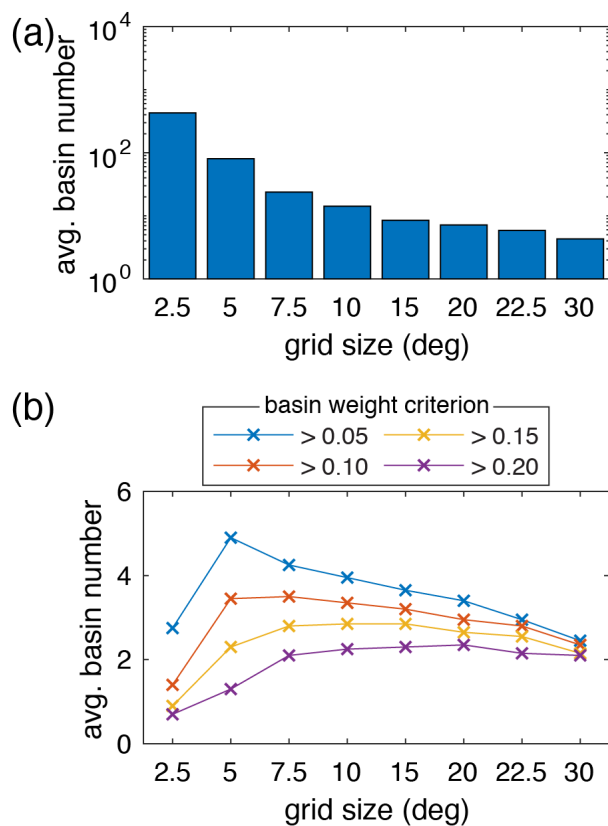

**Figure S3.** Average numbers of basins for different coarse-grained grid sizes. Averaging was performed over all twenty amino acids. (a) Average number of all basins. (b) Average number of basins with different basin weight criteria, as indicated by different colors.

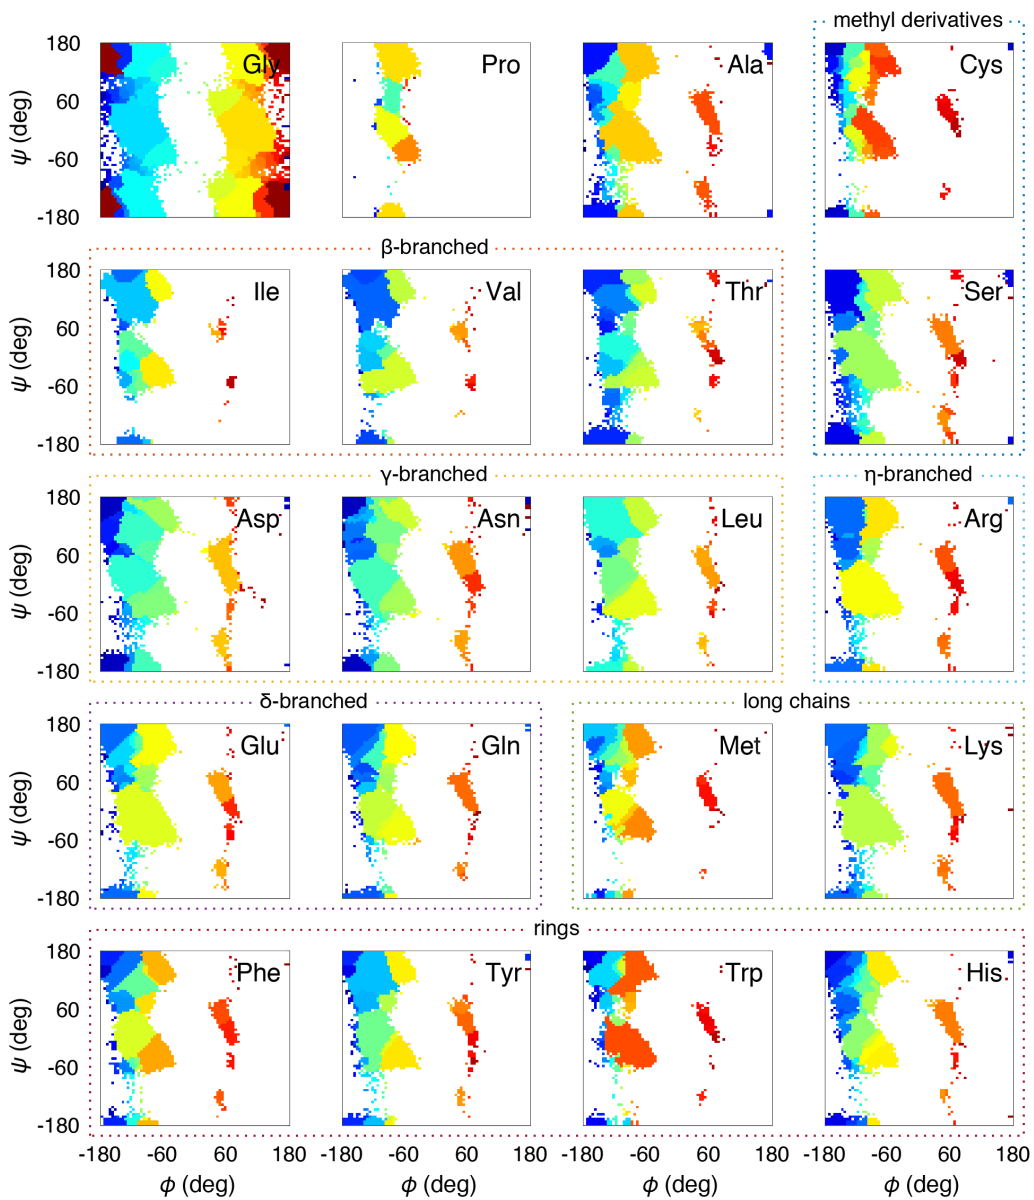

**Figure S4.** Basin structures for coil-library landscapes of 20 amino acids, generated by a  $5^\circ \times 5^\circ$  coarse-grained grid system.

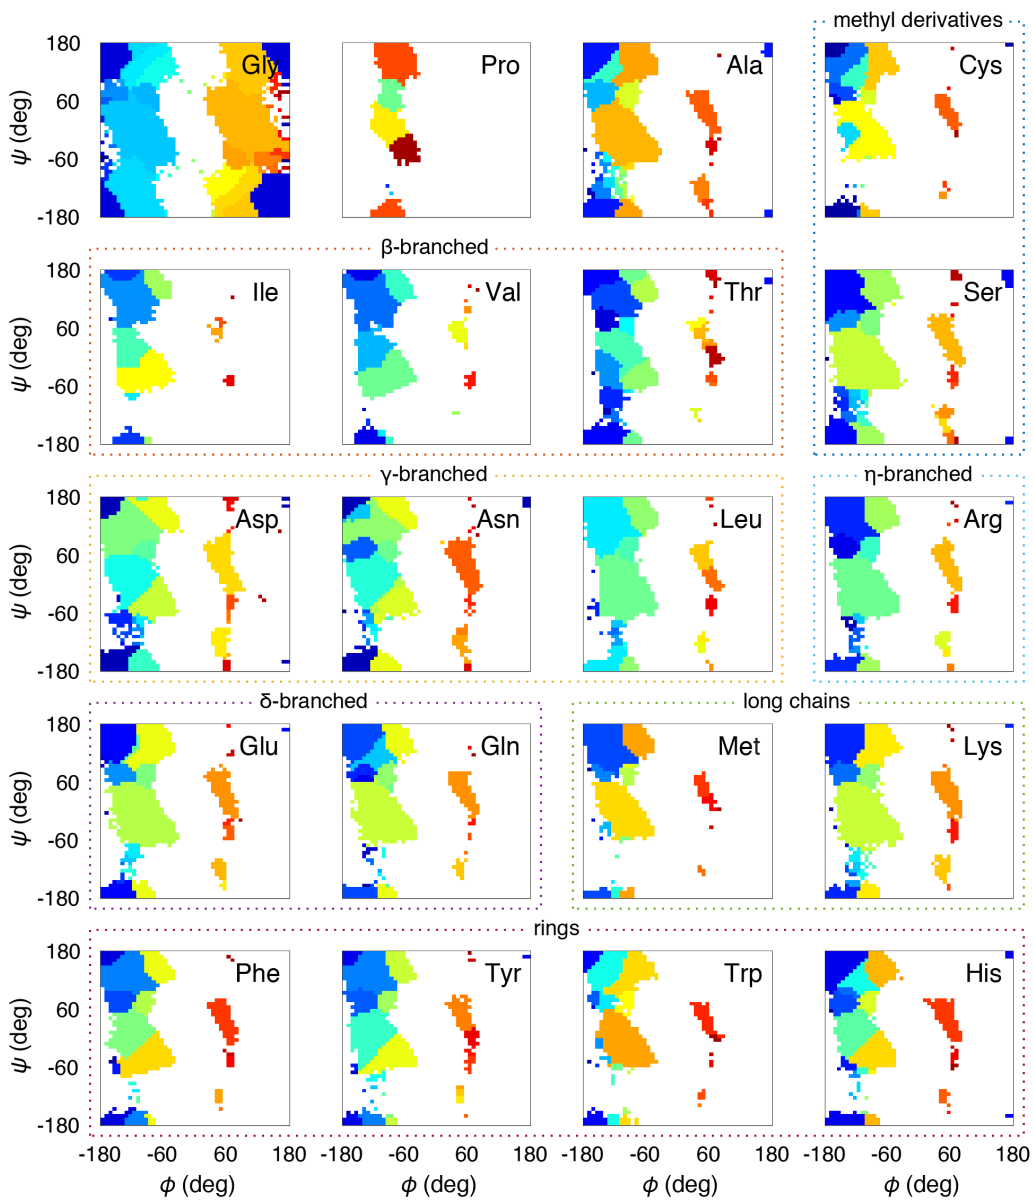

**Figure S5.** Basin structures for coil-library landscapes of 20 amino acids, generated by a  $7.5^\circ \times 7.5^\circ$  coarse-grained grid system.

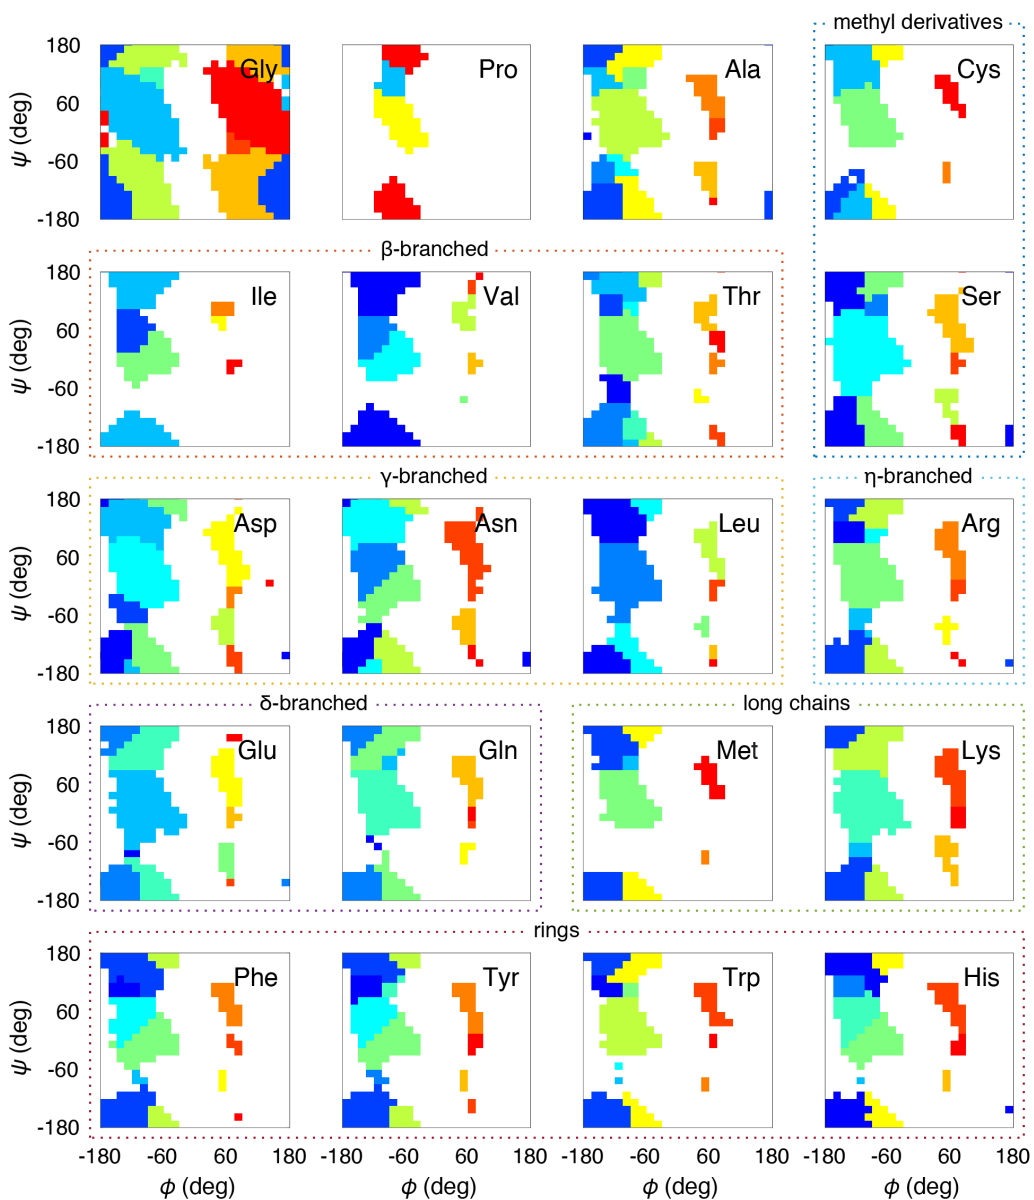

**Figure S6.** Basin structures for coil-library landscapes of 20 amino acids, generated by a  $15^\circ \times 15^\circ$  coarse-grained grid system.



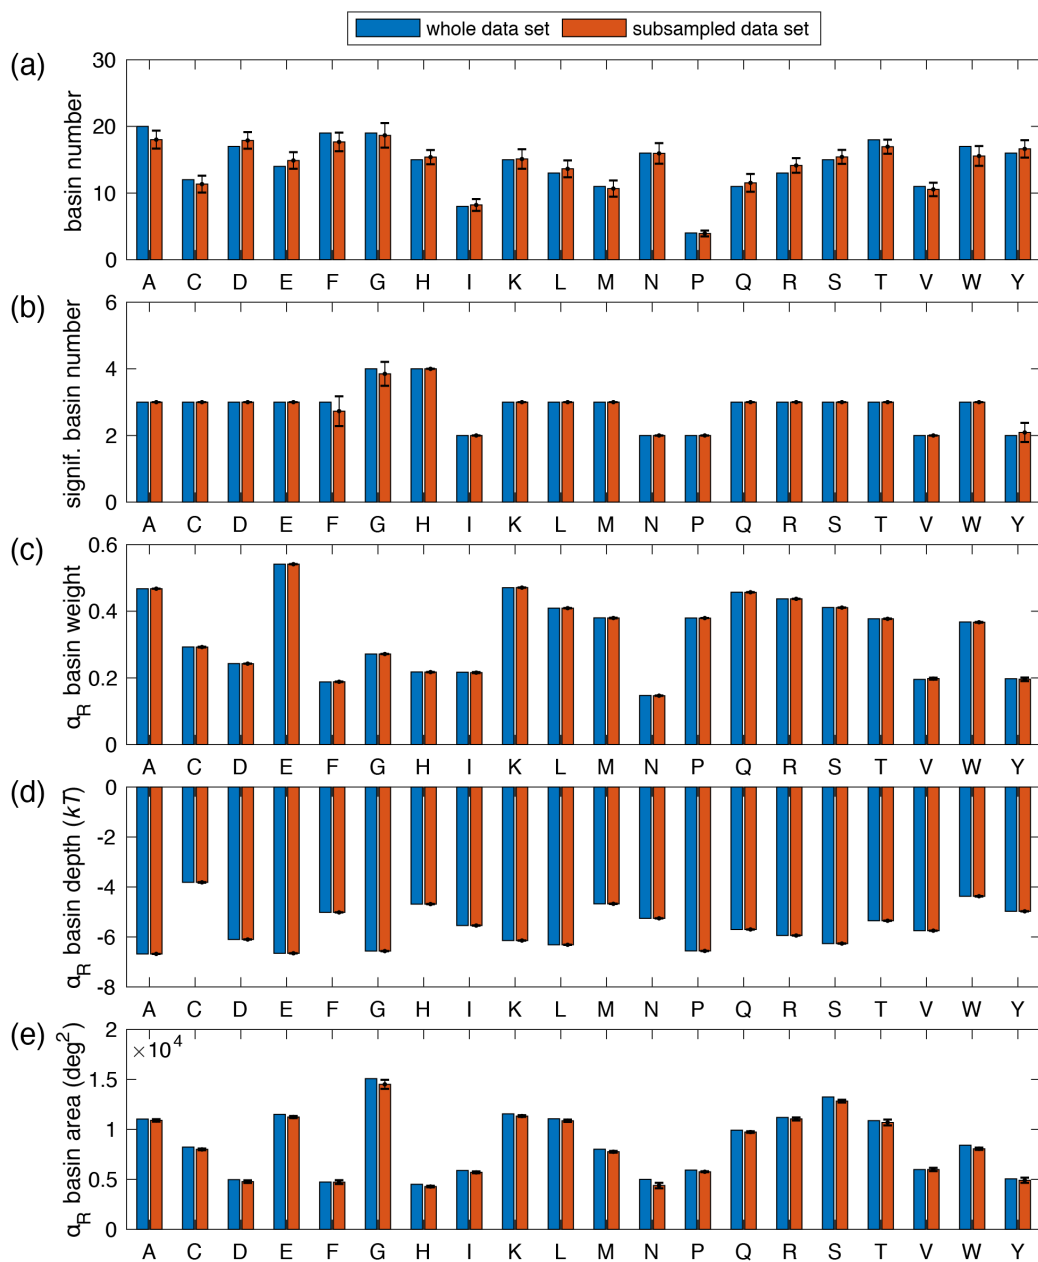

**Figure S7.** Basin analysis statistics of the whole data set (blue) and average statistics of 100 subsampled data sets (red) for all 20 amino acids. Error bars indicate standard deviations. (a) Total number of basins. Maximum standard deviation ( $\sigma_{\max}$ ) = 1.85 (for G); minimum standard deviation ( $\sigma_{\min}$ ) = 0.43 (for P). (b) Number of significant basins, defined as basins with weight larger than 0.15.  $\sigma_{\max}$  = 0.44 (for F);  $\sigma_{\min}$  = 0.0 (for most amino acids). (c) Weight of the  $\alpha_R$  basin.  $\sigma_{\max}$  =  $5.4 \times 10^{-3}$  (for Y);  $\sigma_{\min}$  =  $3.2 \times 10^{-4}$  (for L). (d) Local minimum depth of the  $\alpha_R$  basin in units of  $k_B T$ .  $\sigma_{\max}$  =  $0.013 k_B T$  (for C);  $\sigma_{\min}$  =  $0.0026 k_B T$  (for P). (e) Area of the  $\alpha_R$  basin in units of  $\text{deg}^2$ .  $\sigma_{\max}$  =  $72 \text{ deg}^2$  (for G);  $\sigma_{\min}$  =  $7.5 \text{ deg}^2$  (for P).

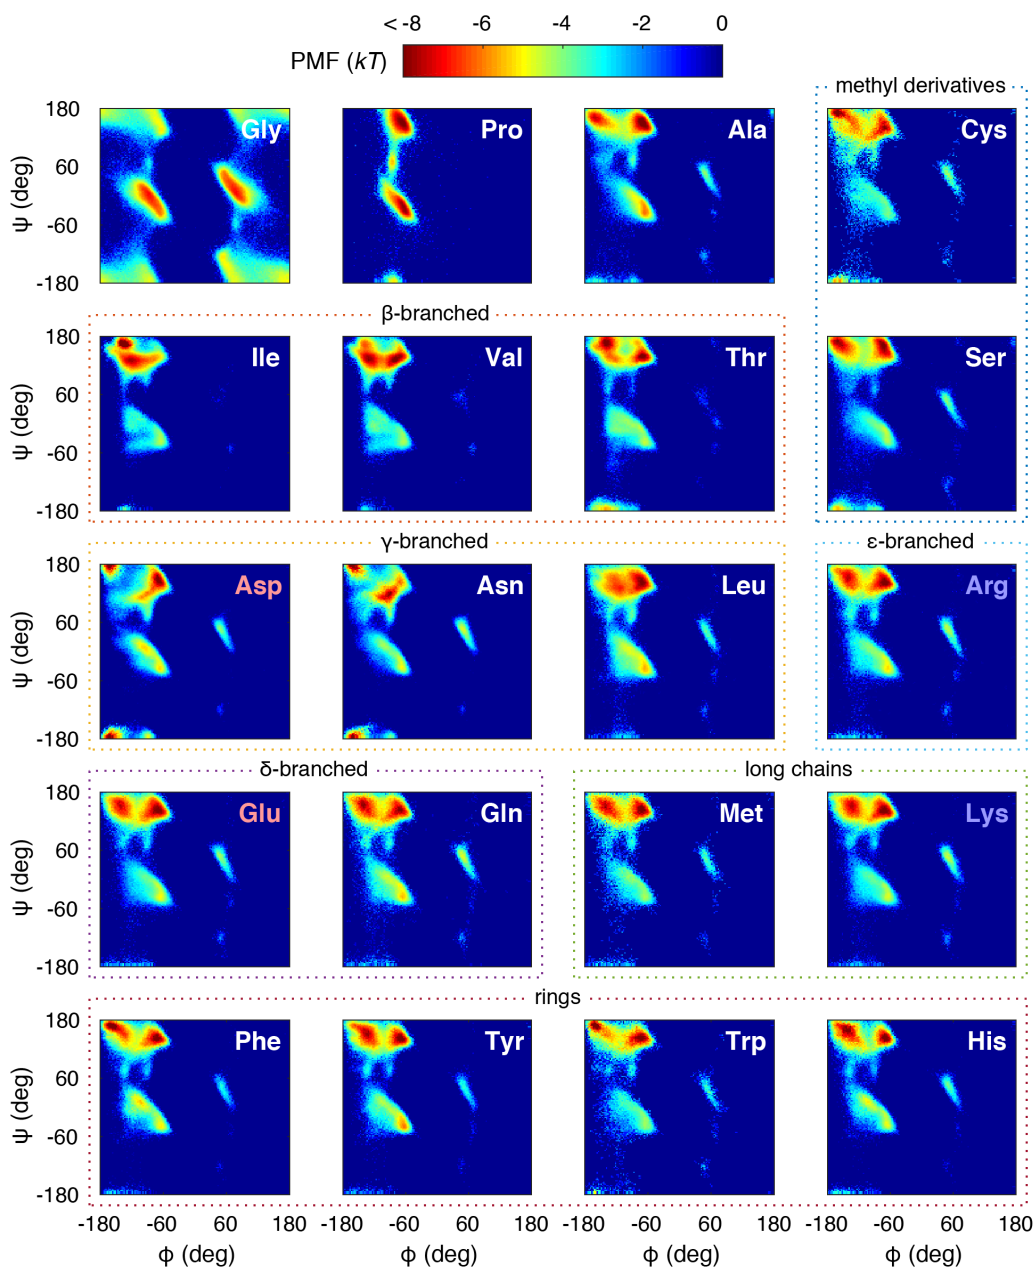

**Figure S8.** Optimized effective free energy landscapes with parameter  $c = 0.975$  for all twenty amino acids with color scale in  $kT$  (top). The total data size for each amino acid is normalized to  $5 \times 10^5$ . See also **Figure 8**.

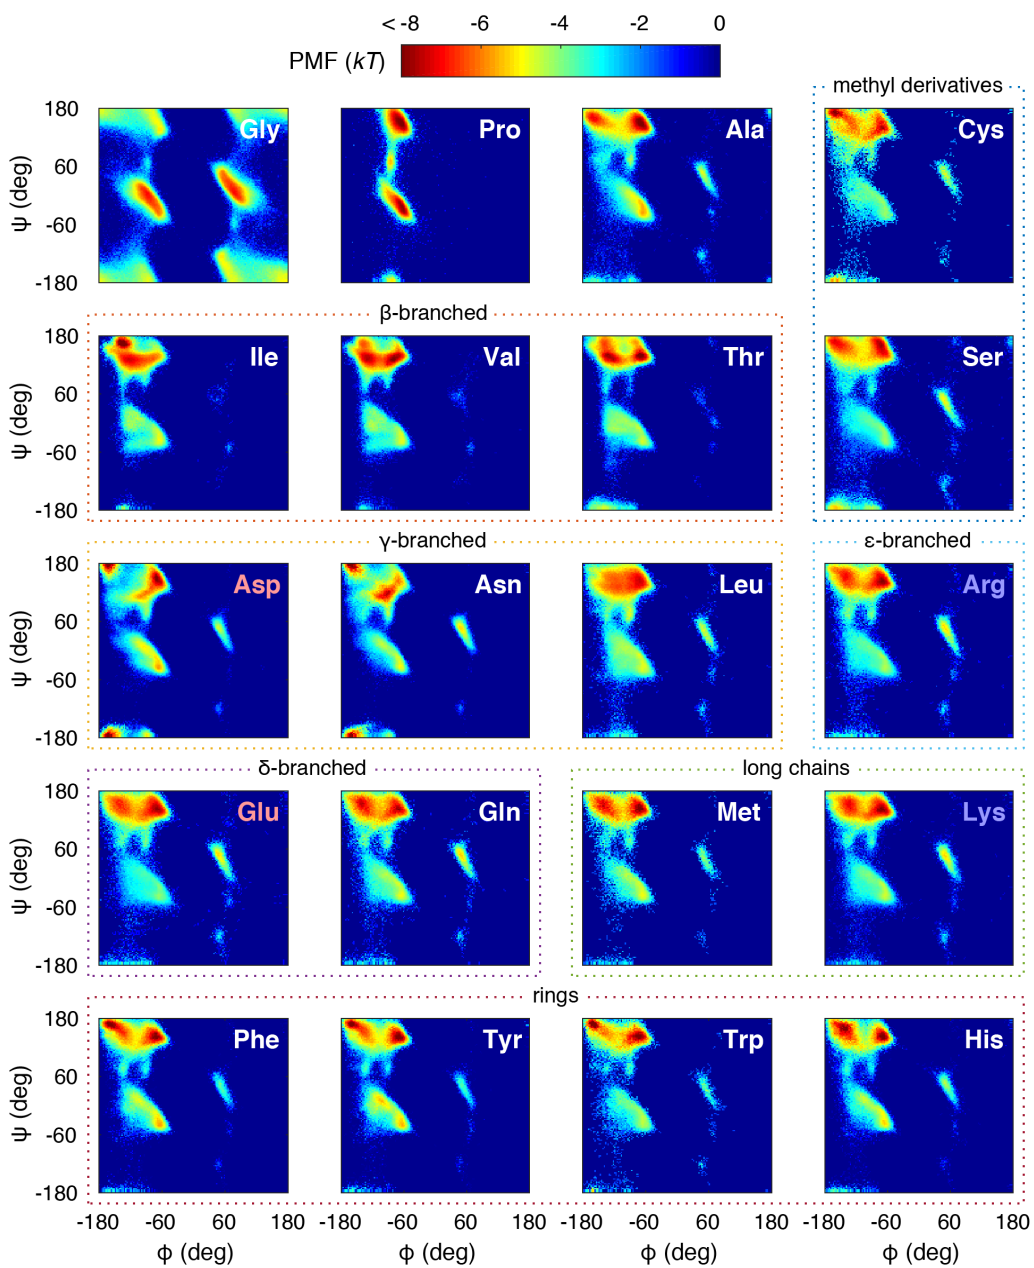

**Figure S9.** Optimized effective free energy landscapes with parameter  $c = 0.95$  for all twenty amino acids with color scale in  $kT$  (top). The total data size for each amino acid is normalized to  $5 \times 10^5$ . See also **Figure 8**.
